# Supplementary material
Source: PubMed Central journal article supplement (PMC5006995)
Supplement: NIHMS804374-supplement-supplement_1.pdf [file NIHMS804374-supplement-supplement_1.pdf]

Supplemental Table 1: Minimally important differences in EPIC-CP by treatment group\*

|            | RP<br>no<br>NS | RP<br>NS | XRT<br>alone | XRT<br>+<br>NHT | BT<br>alone | BT +<br>XRT<br>and/or<br>NHT |
|------------|----------------|----------|--------------|-----------------|-------------|------------------------------|
| <b>UI</b>  | 1.5            | 1.2      | 0.8          | 0.7             | 0.8         | 0.8                          |
| <b>UIO</b> | 1.4            | 1.3      | 1.3          | 1.1             | 1.4         | 1.4                          |
| <b>B</b>   | 1.3            | 0.9      | 1.5          | 1.4             | 1.4         | 1.4                          |
| <b>S</b>   | 1.9            | 1.8      | 1.4          | 1.8             | 1.4         | 1.6                          |
| <b>V/H</b> | 1.3            | 1.0      | 1.0          | 1.2             | 0.9         | 1.2                          |

UI = urinary incontinence, UIO = urinary irritation/obstruction, B = bowel, S = sexual, V/H = vitality/hormonal, RP = radical prostatectomy, NS = nerve sparing, XRT = external beam radiotherapy, NHT = neoadjuvant hormonal therapy, BT = brachytherapy

\*MID represents 0.5 pooled SD of the change between pre-treatment and 2, 6, 12, and 24 months post-treatment



Supplemental Table 2: Model predicting of Functional Erections 2 years after Radical Prostatectomy using pre-treatment a) EPIC-CP Sexual Score and b) EPIC-26 Sexual Score\*

| <b>a) EPIC-CP Based Model</b>                                    | <b>Parameter Estimates (SE)</b> | <b>Odds Ratio (95% CI)</b> | <b>Wald <math>\chi^2</math> P-Value</b> |
|------------------------------------------------------------------|---------------------------------|----------------------------|-----------------------------------------|
| Intercept                                                        | 1.46 (1.14)                     |                            |                                         |
| Pre-treatment EPIC-CP Sexual Score (for every 1 point increase)  | -0.35 (0.06)                    | 0.7 (0.6 – 0.8)            | <0.001                                  |
| Age (for every 10 point increase)                                | -0.59 (0.16)                    | 0.6 (0.4 – 0.8)            | <0.001                                  |
| Nerve-sparing (vs non-nerve sparing)                             | 1.31 (0.51)                     | 3.7 (1.4 – 10.1)           | 0.01                                    |
| PSA $\leq$ 10 (vs > 10)                                          | 0.86 (0.36)                     | 2.4 (1.2 – 4.8)            | 0.01                                    |
| <b>b) EPIC-26 Based Model</b>                                    |                                 |                            |                                         |
| Intercept                                                        | -2.96 (1.38)                    |                            |                                         |
| Pre-treatment EPIC-26 Sexual Score (for every 10 point increase) | 0.45 (0.07)                     | 1.6 (1.4 – 1.8)            | <0.001                                  |
| Age (for every 10 point increase)                                | -0.56 (0.16)                    | 0.6 (0.4 – 0.8)            | <0.001                                  |
| Nerve-sparing (vs non-nerve sparing)                             | 1.29 (0.52)                     | 3.6 (1.3 – 10.1)           | 0.01                                    |
| PSA $\leq$ 10 (vs > 10)                                          | 0.85 (0.36)                     | 2.3 (1.2 – 4.7)            | 0.02                                    |

\*Adapted from Alemozaffar et al<sup>6</sup>

## REFERENCES

1. Sonn GA, Sadetsky N, Presti JC, et al. Differing perceptions of quality of life in patients with prostate cancer and their doctors. *J Urol.* 2013 Jan;189(1 Suppl):S59-65; discussion S65. doi: 10.1016/j.juro.2012.11.032.
2. Litwin MS, Hays RD, Fink A, et al. The UCLA Prostate Cancer Index: development, reliability, and validity of a health-related quality of life measure. *Med Care.* 1998. 36(7):1002-12.
3. Wei JT, Dunn RL, Litwin MS, et al. Development and validation of the Expanded Prostate Cancer Index Composite (EPIC) for comprehensive assessment of health-related quality of life in men with prostate cancer. *Urology.* 2000; 56:899-905.
